# Supplementary material for: Thiol-Silylated Cellulose Nanocrystals as Selective Biodepressants in Froth Flotation
Source: PubMed Central journal article supplement (PMC10647933; doi:10.1021/acssuschemeng.3c04013), 2023-11-02
Supplement: sc3c04013_si_001.pdf [file sc3c04013_si_001.pdf]

## Supporting Information

### Thiol-Silylated Cellulose Nanocrystals as Selective Biodepressants in Froth Flotation

Feliciana Ludovici<sup>1†</sup>, Robert Hartmann<sup>2‡</sup>, Martin Rudolph<sup>3†,‡</sup>, Henrikki Liimatainen<sup>1\*</sup>

<sup>1†</sup>*Fiber and Particle Engineering Research Unit, University of Oulu, P. O. Box 4300, FI-90014 Oulu, Finland*

<sup>2‡</sup>*Fraunhofer Center for Chemical-Biotechnological Processes, 06237 Leuna, Germany*

<sup>3†,‡</sup>*Helmholtz-Zentrum-Dresden-Rossendorf, Helmholtz Institute Freiberg for Resource Technology, 09599 Freiberg, Germany*

\*Corresponding author e-mail: [henrikki.liimatainen@oulu.fi](mailto:henrikki.liimatainen@oulu.fi)

1. Number of Pages: 5 (S1, S2, S3, S4, S5)
2. Number of Figures: 5
3. Number of Tables: 4
4. Page S1: Cover
5. Page S2: Table S1 particle diameter of chalcopyrite and pyrite, Figure S1 particle size distribution of chalcopyrite and pyrite, Figure S2 CNCs modification reaction scheme,
6. Page S3: Figure S3 TEM of modified CNCs, Table S2 XPS analyses of CNCs samples, Table S3 grafting amount and contact angles of CNCs samples,
7. Page S4: Figure S4  $\zeta$ -potential of CNCs samples, Figure S5 FESEM images of chalcopyrite and pyrite,
8. Page S5: Table S4 elemental composition (% w/w) of chalcopyrite and pyrite

Table S1. Particle diameter of quantile sizes and mean diameter of chalcopyrite and pyrite.

| Size quantiles      | Chalcopyrite |             | Pyrite     |             |
|---------------------|--------------|-------------|------------|-------------|
|                     | Fine         | Coarse      | Fine       | Coarse      |
| D <sub>10</sub> /μm | 1.3 ± 0.1    | 69.7 ± 0.2  | 2.1 ± 0.1  | 73.2 ± 0.1  |
| D <sub>50</sub> /μm | 3.4 ± 0.2    | 116.8 ± 0.3 | 4.7 ± 0.2  | 121.9 ± 0.2 |
| D <sub>90</sub> /μm | 12.7 ± 0.7   | 169.9 ± 0.4 | 50.3 ± 2.5 | 187.4 ± 0.5 |
| Mean/μm             | 5.1 ± 0.6    | 116.2 ± 0.2 | 16.2 ± 0.3 | 125.8 ± 0.1 |

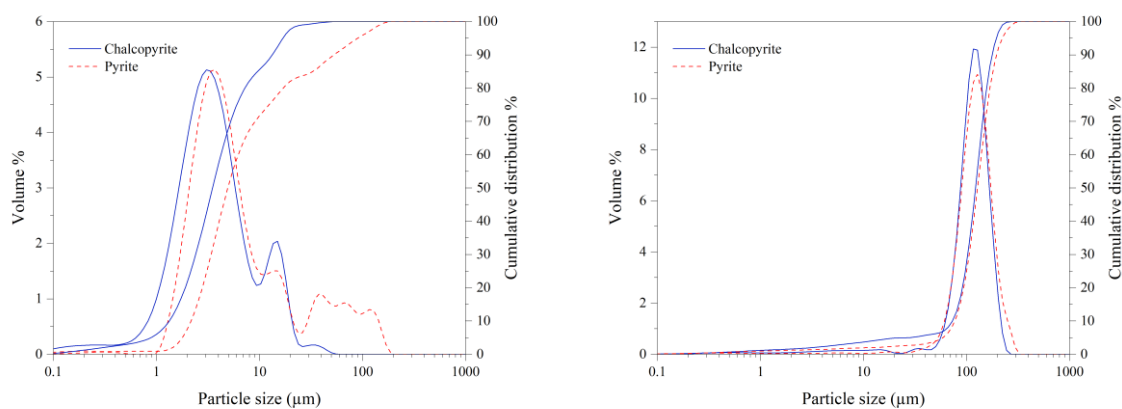

Figure S1. Particle size distribution of fine (left) and coarse (right) fractions of chalcopyrite and pyrite.

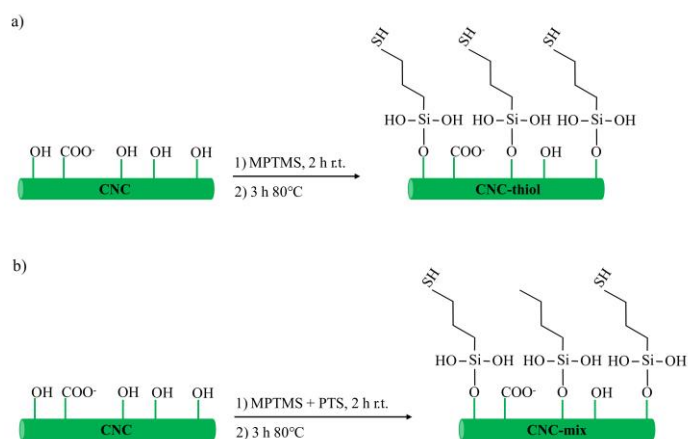

Figure S2. Synthesis of **a)** CNCs containing thiol silane group (CNC-thiol) and **b)** CNCs containing thiol and propyl silane groups (CNC-mix) via aqueous silylation.

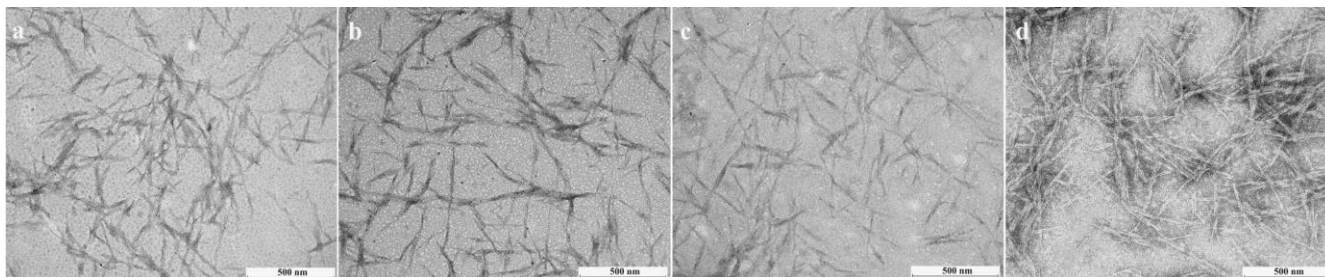

Figure S3. TEM images of functionalized CNCs: a) CNC-thiol I, b) CNC-mix I, c) CNC-thiol II, and d) CNC-mix II.

Table S2. Composition of pristine and functionalized CNCs from XPS analysis.

| Sample       | Surface composition (%) |       |      |      |
|--------------|-------------------------|-------|------|------|
|              | O1s                     | C1s   | Si2p | S2p  |
| CNC          | 42.40                   | 57.61 | -    | -    |
| CNC-thiol I  | 43.57                   | 54.75 | 0.96 | 0.71 |
| CNC-mix I    | 43.28                   | 52.73 | 2.78 | 1.20 |
| CNC-thiol II | 39.97                   | 52.08 | 4.47 | 3.35 |
| CNC-mix II   | 40.49                   | 54.39 | 4.69 | 0.43 |

Table S3. Grafting amount and static contact angle of pristine and silylated CNCs (n = 6).

| Sample       | Cellulose-MPTMS (-PTS)<br>mass ratio | Grafting amount (mmol/g) |      | Static contact angle ( $\theta$ ) |
|--------------|--------------------------------------|--------------------------|------|-----------------------------------|
|              |                                      | Si                       | S    |                                   |
| CNC          | -                                    | -                        | -    | $29.6 \pm 3.6$                    |
| CNC-thiol I  | 1:0.5                                | 0.34                     | 0.22 | $38.1 \pm 3.5$                    |
| CNC-thiol II | 1:1                                  | 1.59                     | 1.05 | $68.6 \pm 1.0$                    |
| CNC-mix I    | 1:0.5:0.5                            | 0.99                     | 0.37 | $62.2 \pm 1.5$                    |
| CNC-mix II   | 1:1                                  | 1.67                     | 0.13 | $52.5 \pm 3.6$                    |

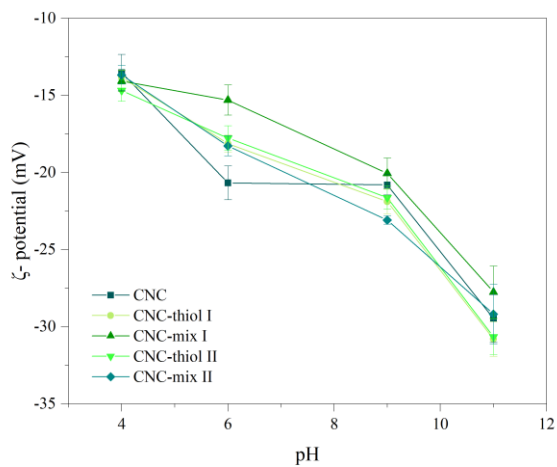

Figure S4.  $\zeta$ -potential of pristine and silylated CNCs; error bars represent single standard deviation ( $n = 6$ ).

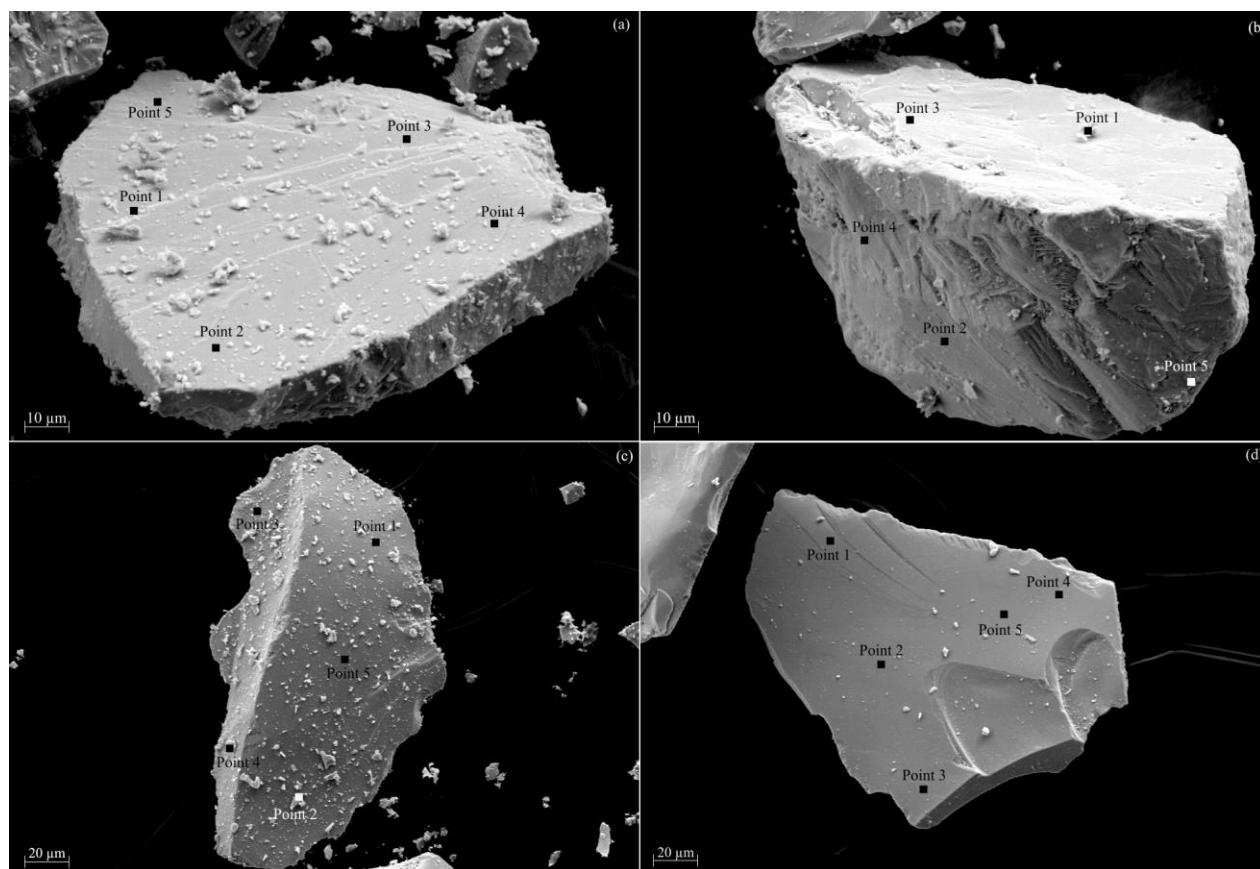

Figure S5. FESEM images of (a) chalcopyrite, (b) chalcopyrite and CNC-thiol II (2.5 mg/L), (c) pyrite, and (d) pyrite and CNC-thiol II (2.5 mg/L).

Table S4. Elemental composition (% w/w) of chalcopyrite and pyrite in the presence and absence of CNC-thiol II with standard deviations (n = 5).

|    | Chalcopyrite | Chalcopyrite and CNC-thiol II | Pyrite       | Pyrite and CNC-thiol II |
|----|--------------|-------------------------------|--------------|-------------------------|
|    | % w/w        |                               |              |                         |
| O  | n.d.         | 12.20 ± 10.34                 | n.d.         | n.d.                    |
| Si | n.d.         | 0.82 ± 0.41                   | n.d.         | n.d.                    |
| S  | 28.74 ± 0.15 | 19.12 ± 10                    | 50.91 ± 2.79 | 52.51 ± 0.50            |
| Fe | 24.09 ± 0.15 | 36.40 ± 15.53                 | 47.97 ± 2.59 | 45.87 ± 0.40            |
| Cu | 46.62 ± 0.65 | 31.08 ± 12.75                 | n.d.         | n.d.                    |
